# Supplementary material for: A novel cognitive-neurophysiological state biomarker in premanifest Huntington's disease validated on longitudinal data
Source: PubMed Central journal article supplement — Sci Rep. 2013 May 8;3:1797. doi: 10.1038/srep01797 (PMC3647202; doi:10.1038/srep01797), 2013-05-08
Supplement: srep01797-s1.pdf [file srep01797-s1.pdf]

Supplementary Material

**A novel cognitive-neurophysiological state biomarker in  
premanifest Huntington's disease validated on longitudinal data**

Christian Beste<sup>1,\*</sup>, Ann-Kathrin Stock<sup>1</sup>, Vanessa Ness<sup>1</sup>, Rainer Hoffmann<sup>2</sup>, Carsten Lukas<sup>3</sup>,  
Carsten Saft<sup>2</sup>

<sup>1</sup> Institute for Cognitive Neuroscience, Biopsychology, Ruhr-University Bochum, Germany

<sup>2</sup> Department of Neurology, Huntington Centre NRW, St. Josef Hospital, Ruhr-University  
Bochum, Germany

<sup>3</sup> Department of Radiology, St. Josef Hospital, Ruhr-University Bochum, Germany

**Table 1:**

Means and standard deviations (SD) for pre-HD subjects in the different experimental conditions at all time points (longitudinal, 15-month, 21-month).

| Parameter               | Baseline (n = 27) | Follow-up 15-month | Follow-up 21-month |
|-------------------------|-------------------|--------------------|--------------------|
| compatible switch       | 654 (50)          | 660 (53)           | 646 (55)           |
| Incompatible switch     | 834 (49)          | 976 (65)           | 1023 (65)          |
| compatible non-switch   | 601 (38)          | 611 (38)           | 598 (37)           |
| Incompatible non-switch | 666 (37)          | 672 (35)           | 658 (38)           |

**Table 2:**

Baseline group statistics of premanifest HD mutation carriers at baseline, 15 and 21 month follow up and controls. Data of matched controls are only shown at baseline. Of the 30 participants enrolled at baseline, 27 (90%) completed the 15 month and 27 (90%) completed the 21 month follow-up assessment. We included 27 participants who contributed to all three datasets in the statistical analysis. Values are given as mean  $\pm$  SD; range (min-max) in brackets; <sup>s</sup> = including two mutation carriers with a pheno-conversion to manifest HD, <sup>#</sup> = two manifest HD patients excluded, <sup>%</sup> = complete datasets for 26 participants; <sup>+</sup> = complete datasets for 25 participants (Cohen's d effect size for absolute MRI measures in ml: 15 month interval 0.14, for 6 month interval 0.11). Abbreviations: yr – years, OP – onset probability, YTO – years to onset, UHDRS – unified Huntington's disease rating scale, MS – motor score TFC – total functional capacity, IS – independence scale, CS – cognitive sum score; SDMT – symbol digit modality test.

| Parameter                           | preHD Baseline (n = 27)                  | preHD (n = 27) <sup>s</sup><br>Follow-up 15 Month | preHD (n = 27) <sup>s</sup><br>Follow-up 21 Month |
|-------------------------------------|------------------------------------------|---------------------------------------------------|---------------------------------------------------|
| Age [yr]                            | 39.3 $\pm$ 10.6 (23-63)                  | 40.6 $\pm$ 10.7 (24-64)                           | 41.1 $\pm$ 10.5 (25-64)                           |
| Gender (male/female)                | 12/15                                    | 12/15                                             | 12/15                                             |
| CAG expanded                        | 42.1 $\pm$ 2.2 (38-48)                   | 42.1 $\pm$ 2.2 (38-48)                            | 42.1 $\pm$ 2.2 (38-48)                            |
| Disease burden score                | 250.1 $\pm$ 79.3 (108.5-412.5)           | 258.3 $\pm$ 81.9 (115.5-427.5)                    | 262.1 $\pm$ 82.4 (115.5-427.5)                    |
| 5 year OP [%]                       | 17.2 $\pm$ 17.4 (0.6-60.1)               | 16.9 $\pm$ 16.7 (0.7-52.9) <sup>#</sup>           | 18 $\pm$ 17.3 (0.7-52.9) <sup>#</sup>             |
| YTO Langbehn [yr]                   | 16.1 $\pm$ 8.7 (5.3-38.4)                | 16.4 $\pm$ 8.9 (5.9-36.4) <sup>#</sup>            | 16 $\pm$ 8.8 (5.9-36.4) <sup>#</sup>              |
| YTO Ranen [yr]                      | 6.6 $\pm$ 8 (-12.5-19.8)                 | 6.8 $\pm$ 6.6 (-7.7-17.8) <sup>#</sup>            | 6.2 $\pm$ 6.5 (-7.7-17.8) <sup>#</sup>            |
| UHDRS MS                            | 2.9 $\pm$ 2.6 (0-8)                      | 4.4 $\pm$ 4.8 (0-15)                              | 4.4 $\pm$ 4.7 (0-17)                              |
| UHDRS TFC                           | 12.9 $\pm$ 0.2 (12-13)                   | 12.8 $\pm$ 0.3 (12-13)                            | 12.8 $\pm$ 0.4 (12-13)                            |
| UHDRS IS                            | 99.4 $\pm$ 1.6 (95-100)                  | 98.7 $\pm$ 3.6 (85-100)                           | 98.7 $\pm$ 3.3 (90-100)                           |
| UHDRS CS                            | 332.4 $\pm$ 41.4 (238-423)               | 329.7 $\pm$ 44 (234-425)                          | 342 $\pm$ 41.7 (242-433)                          |
| Verbal fluency                      | 42.4 $\pm$ 10.9 (17-64)                  | 41 $\pm$ 10.4 (21-64)                             | 43.9 $\pm$ 14.8 (15-83)                           |
| SDMT                                | 54.3 $\pm$ 9.9 (36-78)                   | 53.4 $\pm$ 10.6 (36-76)                           | 56.1 $\pm$ 10.5 (37-74)                           |
| Stroop interference                 | 51.4 $\pm$ 8.9 (31-66)                   | 50.4 $\pm$ 9.1 (31-78)                            | 51 $\pm$ 9.2 (33-77)                              |
| Stroop color                        | 77.5 $\pm$ 10.5 (59-101)                 | 79.9 $\pm$ 11.8 (61-107)                          | 81.7 $\pm$ 10.3 (58-104)                          |
| Stroop word                         | 106.8 $\pm$ 14.2 (81-136)                | 105.1 $\pm$ 15.6 (76-137)                         | 109.1 $\pm$ 13 (81-138)                           |
| Pegboard dominant <sup>36</sup>     | 42.8 $\pm$ 9.7 (32-56) <sup>%</sup>      | 43.7 $\pm$ 4.7 (33.7-52.6) <sup>%</sup>           | 42.4 $\pm$ 4.7 (33.8-52.8) <sup>%</sup>           |
| Pegboard non dominant <sup>36</sup> | 45.8 $\pm$ 11.3 (33.4-63.5) <sup>%</sup> | 46.8 $\pm$ 6.2 (32.7-56.3) <sup>%</sup>           | 45.2 $\pm$ 6.4 (35.9-59.1) <sup>%</sup>           |

|                                    |                                     |                                        |                                      |
|------------------------------------|-------------------------------------|----------------------------------------|--------------------------------------|
| Tapping dominant <sup>37</sup>     | 195.2 ± 21.6 (143-226)              | 188.9 ± 24.2 (140-230)                 | 192.1 ± 22.8 (147-238)               |
| Tapping non dominant <sup>37</sup> | 176.4 ± 24.1 (127-239)              | 170.6 ± 23.7 (128-221)                 | 175 ± 23.2 (122-224)                 |
| Hamilton Depression Inventory      | 6.6 ± 6.2 (0-22)                    | 6.4 ± 8.1 (0-28)                       | 6.2 ± 5.5 (0-22)                     |
| Caudatum volume [ml] <sup>35</sup> | 3.02 ± 0.76 (1.3-4.15) <sup>4</sup> | 2.92 ± 0.75 (1.31 – 4.04) <sup>+</sup> | 2.84 ± 0.75 (1.16-4.14) <sup>+</sup> |
